# Supplementary material for: Safety of BA.4-5 or BA.1 bivalent mRNA booster vaccines: nationwide cohort study
Source: PubMed Central journal article supplement — BMJ. 2023 Jul 25;382:e075015. doi: 10.1136/bmj-2023-075015 (PMC10364193; doi:10.1136/bmj-2023-075015), 2023-07-25
Supplement: andn075015.ww.pdf [file andn075015.ww.pdf]

## Supplementary Material

### Safety of BA.4-5 or BA.1 bivalent mRNA booster vaccines: nationwide cohort study

#### Table of contents

|                                                                                                                                                                                                                                                                                                                        |    |
|------------------------------------------------------------------------------------------------------------------------------------------------------------------------------------------------------------------------------------------------------------------------------------------------------------------------|----|
| Supplementary Table S1. Eligibility criteria and covariates definition.....                                                                                                                                                                                                                                            | 3  |
| Supplementary Table S2. Outcome definitions.....                                                                                                                                                                                                                                                                       | 5  |
| Supplementary Figure S1. Distribution of follow-up person-time during the studied calendar period by main risk and reference periods. ....                                                                                                                                                                             | 6  |
| Supplemental Table S3. Number of events and person-years within 28 days after vaccination with a bivalent omicron-containing mRNA-booster vaccine as the fourth dose in Danish 50+-year-olds during 15 September 2022 to 10 December 2022 by sex and age.....                                                          | 7  |
| Supplementary Table S4: Number of events and person-years within 28 days after vaccination with a bivalent omicron-containing vaccine as a fourth dose by type of vaccine and reference period in Danish 50+ year-olds during 15 September 2022 to 10 December 2022. <sup>a</sup> .....                                | 11 |
| Supplementary Table S5: Risk of adverse events within 28 days after vaccination with a bivalent omicron-containing mRNA-booster vaccine as the fourth dose in Danish 50+ year-olds during 15 September 2022 to 10 December 2022 using an alternative analytical approach of a self-controlled case series design. .... | 13 |
| Supplementary Table S6: Risk of adverse events within 28 days after vaccination with a bivalent omicron-containing mRNA-booster vaccine as the fourth dose in Danish 50+ year-olds during 15 September 2022 to 10 December 2022 using an alternative analytical approach of an observed vs expected design. ....       | 14 |
| Supplementary Table S7: Risk of severe adverse events (hospitalization for $\geq 5$ hours) within 28 days after vaccination with a bivalent omicron-containing vaccine as a fourth dose in Danish 50+ year-olds during 15 September 2022 to 10 December 2022. ....                                                     | 15 |
| Supplementary Table S8: Sensitivity analysis of the associated risk of adverse events within 28 days following fourth dose bivalent omicron-containing booster vaccination including both primary and secondary diagnoses in the outcome definitions.....                                                              | 16 |
| Supplementary Table S9. Risk of adverse events after vaccination with a bivalent omicron-containing mRNA-booster vaccine as the fourth dose in Danish 50+ year-olds during 15 September 2022 to 10 December 2022 with use of alternative risk periods. ....                                                            | 17 |
| Supplementary Table S10. Risk of adverse events within 28 days after vaccination with a bivalent omicron-containing mRNA-booster vaccine as the fourth dose in Danish 50+ year-olds during 15 September 2022 to 10 December 2022 including first SARS-CoV-2 infection as time-varying covariate. ....                  | 20 |
| Supplementary Table S11. Risk of adverse events within 28 days after vaccination with a bivalent omicron-containing mRNA-booster vaccine as the fourth dose in Danish 50+ year-olds during 15 September 2022 to 10 December 2022 with calendar month adjustment. ....                                                  | 21 |

|                                                                                                                                                                                                                                                                                                               |    |
|---------------------------------------------------------------------------------------------------------------------------------------------------------------------------------------------------------------------------------------------------------------------------------------------------------------|----|
| Supplemental Table S12. Risk of adverse events within 28 days after vaccination with a bivalent omicron-containing mRNA-booster vaccine as the fourth dose in Danish 50+ year-olds during 15 September 2022 to 10 December 2022 as compared with two reference periods separately. ....                       | 22 |
| Supplementary Table S13: Risk of cerebrovascular infarction, myocarditis and/or pericarditis after vaccination with the individual bivalent omicron-containing vaccine types as a fourth dose by sex and age groups within 28 days in Danish 50+ year-olds during 15 September 2022 to 10 December 2022. .... | 24 |
| Supplementary Table S14. Risk of cerebrovascular infarction within 28 days after vaccination with a bivalent omicron-containing mRNA-booster vaccine as the fourth dose in Danish 50+ year-olds during 15 September 2022 to 10 December 2022 by influenza vaccination on the same day. ....                   | 27 |
| Supplementary references .....                                                                                                                                                                                                                                                                                | 28 |

## Supplementary Table S1. Eligibility criteria and covariates definition.

| Variable                                                                       | Details                                                                                                                                                                                                                                                                                                                                                                                                                                                           |
|--------------------------------------------------------------------------------|-------------------------------------------------------------------------------------------------------------------------------------------------------------------------------------------------------------------------------------------------------------------------------------------------------------------------------------------------------------------------------------------------------------------------------------------------------------------|
| <b>Eligibility criteria</b>                                                    |                                                                                                                                                                                                                                                                                                                                                                                                                                                                   |
| Age of 50 years or older                                                       | <i>The Civil Registration System</i> <sup>1</sup> . Defined by time birthyear and year 2022. Because of national vaccine policy of fourth dose rollout, individuals had to be born in year 1972 or earlier.                                                                                                                                                                                                                                                       |
| Vaccinated with a primary course and one booster Covid-19.                     | <i>The Danish Vaccination Register</i> <sup>2</sup> . Defined as registered received three previous Covid-19 vaccines with the BNT162b2 and/or mRNA-1273 as well as and/or AZD1222 vaccine (the latter as part of the primary vaccination course only). Other vaccine types were rare within our study population. During the national rollout of the primary vaccination course, vaccination with the AZD1222 vaccine was halted in Denmark in early March 2021. |
| Third vaccine dose not received earlier than 9 September 2021 <sup>a</sup>     | <i>The Danish Vaccination Register</i> <sup>2</sup> . First day of national rollout of the third (i.e., first booster vaccine dose) to the general Danish population.                                                                                                                                                                                                                                                                                             |
| Third vaccine dose not received within 90 days of the second dose <sup>b</sup> | <i>The Danish Vaccination Register</i> <sup>2</sup> . As vaccination with a third vaccine dose within 90 days of the primary vaccination schedule does not constitute as a booster dose per se, but rather a part of the primary vaccination schedule.                                                                                                                                                                                                            |
| <b>Covariates</b>                                                              |                                                                                                                                                                                                                                                                                                                                                                                                                                                                   |
| Ethnicity                                                                      | <i>The Civil Registration System</i> <sup>1</sup> . Defined by registered place of birth and categorized according Nordic (Denmark, Finland, Norway, or Sweden), Western (rest of Europe, United States, Australia or New Zealand), and non-Western countries (all others).                                                                                                                                                                                       |
| Region of residency                                                            | <i>The Civil Registration System</i> <sup>1</sup> . Defined by the last registered address at baseline (1 January 2021) and grouped according: Northern Denmark Region, Central Denmark Region, Region of Southern Denmark, Capital Region of Denmark, and Region Zealand.                                                                                                                                                                                        |
| Vaccination priority groups                                                    | <i>The Danish Vaccination Register</i> <sup>2</sup> . The Danish Health Agency have provided the governmentally assigned Covid-19 vaccine priority groups that were among other prioritized according to high risk of severe Covid-19 (yes/no; last update 24 May 2021).                                                                                                                                                                                          |
| <b>Comorbidities</b>                                                           | <i>The National Patient Register</i> <sup>3</sup> . Defined as primary diagnoses assigned by the treating physician and registered according to ICD-10 classification system regardless of type of hospital contact registered between 1 January 2018 and baseline (1 January 2021) and included as a categorized sum (0, 1, or $\geq 2$ comorbidities).                                                                                                          |
| Asthma                                                                         | ICD-10 codes: J45, J46                                                                                                                                                                                                                                                                                                                                                                                                                                            |
| Chronic respiratory disorder                                                   | ICD-10 codes: E84, J41-J44, J47, J84                                                                                                                                                                                                                                                                                                                                                                                                                              |
| Chronic cardiac disorder                                                       | ICD-10 codes: I05-I08, I20-I28, I34-I37, I42-I51                                                                                                                                                                                                                                                                                                                                                                                                                  |
| Renal disorder                                                                 | ICD-10 codes: N03, N05, N07, N18, N19, N25, N26, N27                                                                                                                                                                                                                                                                                                                                                                                                              |
| Diabetes                                                                       | ICD-10 codes: E10-E14                                                                                                                                                                                                                                                                                                                                                                                                                                             |

|                      |                                                                                                                                                                                                                                                                                                                         |
|----------------------|-------------------------------------------------------------------------------------------------------------------------------------------------------------------------------------------------------------------------------------------------------------------------------------------------------------------------|
| Autoimmune disorder  | ICD-10 codes: D510, D590, D591, D690, D693, D86, E035, E039, E050, E055, E059, E063, E065, E271, E272, E310, G04, G131, G35, G36, G61, G700, H20, I00, I02, K50, K51, K732, K743, K900, L10, L12, L130, L40, L63, L80, M05, M06, M08, M30, M311, M313, M315, M316, M317, M32-M34, M350, M351-M353, M358, M359, M45, M60 |
| Epilepsy             | ICD-10 codes: G40, G41                                                                                                                                                                                                                                                                                                  |
| Malignancy           | ICD-10 codes: C00-C96 (not C44), D70-D72, D730, D81-D84                                                                                                                                                                                                                                                                 |
| Psychiatric disorder | ICD-10 codes: F00-F99                                                                                                                                                                                                                                                                                                   |

---

ICD-10 denotes International Classification of Diseases System, version 10. <sup>a</sup>Similarly, we censored individuals vaccinated with a fourth dose prior to 15 September 2022 (first day of national rollout of the fourth vaccine dose to the general population). <sup>b</sup>Similarly, we censored individuals receiving a fourth dose within 90 days of the third dose. We also excluded individuals with history of the respective outcome under studied prior to the follow-up period.

## Supplementary Table S2. Outcome definitions.

| Outcomes                                            | ICD-10 codes                                                                |
|-----------------------------------------------------|-----------------------------------------------------------------------------|
| Anaphylaxis                                         | T782, T783, T805, T886                                                      |
| Ischemic cardiac event                              | I20-I251                                                                    |
| Cerebrovascular event                               | I60-66, G450-G453                                                           |
| Cerebrovascular infarction (incl. TIA) <sup>b</sup> | I63, I64, G450-453                                                          |
| Arterial thromboembolism                            | I74                                                                         |
| Deep venous thrombosis                              | I80-82 (not I800, I808C, or I821)                                           |
| Pulmonary embolism                                  | I26                                                                         |
| Myocarditis or pericarditis                         | I300, I308, I309, I328, I401, I408, I409, I418, I514                        |
| Myocarditis <sup>b</sup>                            | I401, I408, I409, I418, I514                                                |
| Pericarditis <sup>b</sup>                           | I300, I308, I309, I328                                                      |
| Cerebral venous thrombosis                          | I636, I676                                                                  |
| Thrombocytopenia or coagulative disorders           | D65, D683, D686, D688-689, D690, D693-D699 (not D697 or D698A)              |
| Guillain-Barré syndrome                             | G610                                                                        |
| Bell's palsy                                        | G510                                                                        |
| Transverse myelitis                                 | G373                                                                        |
| Encephalomyelitis or encephalitis                   | G040, G040A, G048, G049, G058, G361                                         |
| Narcolepsy                                          | G474                                                                        |
| Appendicitis                                        | K35-K37                                                                     |
| Aseptic arthritis                                   | M10, M119, M130, M131, M139                                                 |
| Type 1 diabetes mellitus                            | E10                                                                         |
| Subacute thyroiditis                                | E061                                                                        |
| Heart failure                                       | I110, I420, I426-I429, I50, J81,                                            |
| Arrhythmia                                          | I44-I49                                                                     |
| Acute liver failure                                 | K71, K72                                                                    |
| Acute kidney failure                                | D593, I12, I13, N00-N02, N04-N05, N08, N10, N141, N142, N144, N17, N19, R34 |
| Acute pancreatitis                                  | K850, K853, K858, K859                                                      |
| Erythema multiforme                                 | L51                                                                         |
| Seizure                                             | G40, G41                                                                    |
| Arterial Aneurysm                                   | I71, I72                                                                    |
| Uveitis                                             | H20, H30                                                                    |

ICD-10 denotes International Classification of Diseases System, version 10, TIA transient cerebral ischemic attack, and NA not applicable; information on death was gathered from the Danish Civil Registration System. <sup>a</sup>Diagnoses were identified through use of the Danish National Patient Register. Only diagnoses registered as primary diagnoses were included in the outcome definitions, however, secondary diagnoses were included in a sensitivity analysis. Main outcome definition included any hospital contact, whereas in a sensitivity analysis we defined severe adverse events as by hospital contacts with a duration of  $\geq 5$  hours <sup>b</sup>Examined separately post-hoc.

**Supplementary Figure S1. Distribution of follow-up person-time during the studied calendar period by main risk and reference periods.**

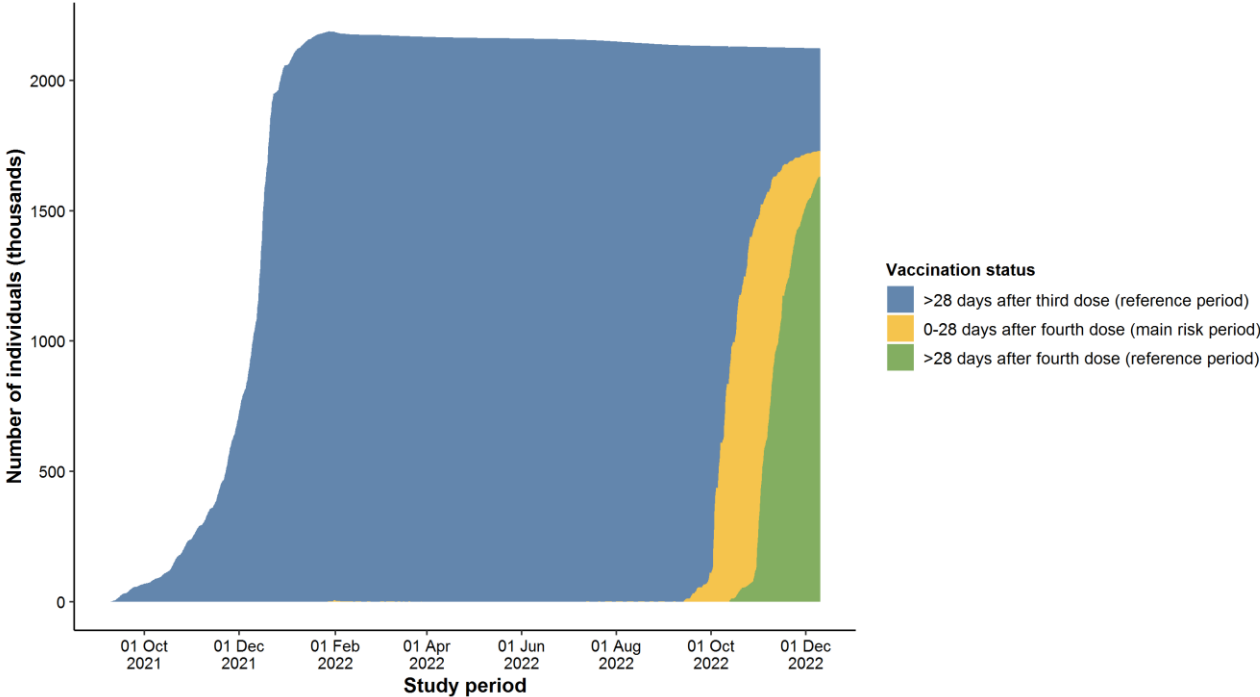

**Supplemental Table S3. Number of events and person-years within 28 days after vaccination with a bivalent omicron adapted mRNA-booster vaccine as the fourth dose in Danish 50+-year-olds during 15 September 2022 to 10 December 2022 by sex and age.**

| Outcome event / subgroup           | Number of events / person-years |               |                |                |                   |
|------------------------------------|---------------------------------|---------------|----------------|----------------|-------------------|
|                                    | Female                          | Male          | 50 to 64 years | 65 to 79 years | 80 years or older |
| <b>Anaphylaxis</b>                 |                                 |               |                |                |                   |
| Bivalent boosters                  | 14 / 68995                      | 16 / 61165    | 11 / 53473     | 14 / 56826     | 5 / 19860         |
| Reference period                   | 186 / 990447                    | 177 / 901198  | 140 / 865609   | 164 / 746874   | 59 / 279162       |
| <b>Ischemic cardiac event</b>      |                                 |               |                |                |                   |
| Bivalent boosters                  | 231 / 67655                     | 441 / 58541   | 169 / 52502    | 373 / 54742    | 130 / 18953       |
| Reference period                   | 3327 / 972545                   | 6665 / 865900 | 3089 / 850978  | 4821 / 720529  | 2082 / 266938     |
| <b>Cerebrovascular event</b>       |                                 |               |                |                |                   |
| Bivalent boosters                  | 365 / 67597                     | 433 / 59288   | 132 / 52883    | 385 / 55219    | 281 / 18783       |
| Reference period                   | 5229 / 971701                   | 6294 / 876030 | 2276 / 856918  | 5200 / 726358  | 4047 / 264456     |
| <b>Arterial thromboembolism</b>    |                                 |               |                |                |                   |
| Bivalent boosters                  | 10 / 69028                      | 11 / 61174    | 3 / 53502      | 12 / 56846     | 6 / 19854         |
| Reference period                   | 187 / 990873                    | 198 / 901261  | 88 / 866028    | 179 / 747045   | 118 / 279061      |
| <b>Deep vein thrombosis</b>        |                                 |               |                |                |                   |
| Bivalent boosters                  | 111 / 68480                     | 126 / 60508   | 80 / 53134     | 113 / 56290    | 44 / 19564        |
| Reference period                   | 1621 / 983407                   | 1972 / 892241 | 1170 / 860542  | 1552 / 739945  | 871 / 275162      |
| <b>Pulmonary embolism</b>          |                                 |               |                |                |                   |
| Bivalent boosters                  | 107 / 68630                     | 109 / 60748   | 36 / 53326     | 110 / 56446    | 70 / 19606        |
| Reference period                   | 1625 / 985567                   | 1711 / 895550 | 759 / 863542   | 1579 / 741886  | 998 / 275689      |
| <b>Myocarditis or pericarditis</b> |                                 |               |                |                |                   |
| Bivalent boosters                  | 15 / 69029                      | 14 / 61168    | 11 / 53482     | 16 / 56848     | 2 / 19867         |
| Reference period                   | 130 / 990933                    | 192 / 901182  | 159 / 865748   | 122 / 747120   | 41 / 279247       |
| <b>Cerebral venous thrombosis</b>  |                                 |               |                |                |                   |
| Bivalent boosters                  | 1 / 69067                       | 2 / 61229     | 1 / 53523      | 2 / 56892      | 0 / 19881         |
| Reference period                   | 20 / 991453                     | 17 / 902057   | 16 / 866393    | 18 / 747686    | 3 / 279431        |

**Supplemental Table S3. Number of events and person-years within 28 days after vaccination with a bivalent omicron adapted mRNA-booster vaccine as the fourth dose in Danish 50+-year-olds during 15 September 2022 to 10 December 2022 by sex and age.**

| Outcome event / subgroup                          | Number of events / person-years |               |                |                |                   |
|---------------------------------------------------|---------------------------------|---------------|----------------|----------------|-------------------|
|                                                   | Female                          | Male          | 50 to 64 years | 65 to 79 years | 80 years or older |
| <b>Thrombocytopenia and coagulative disorders</b> |                                 |               |                |                |                   |
| Bivalent boosters                                 | 16 / 68972                      | 14 / 61130    | 10 / 53452     | 14 / 56811     | 6 / 19840         |
| Reference period                                  | 234 / 990059                    | 255 / 900620  | 163 / 865273   | 200 / 746567   | 126 / 278839      |
| <b>Guillain-Barré syndrome</b>                    |                                 |               |                |                |                   |
| Bivalent boosters                                 | 0 / 69066                       | 1 / 61225     | 1 / 53522      | 0 / 56890      | 0 / 19880         |
| Reference period                                  | 22 / 991431                     | 26 / 901994   | 19 / 866363    | 18 / 747639    | 11 / 279424       |
| <b>Bell's palsy</b>                               |                                 |               |                |                |                   |
| Bivalent boosters                                 | 15 / 69003                      | 14 / 61160    | 11 / 53465     | 11 / 56835     | 7 / 19863         |
| Reference period                                  | 224 / 990574                    | 225 / 901105  | 222 / 865526   | 168 / 746966   | 59 / 279187       |
| <b>Transverse myelitis</b>                        |                                 |               |                |                |                   |
| Bivalent boosters                                 | 0 / 69070                       | 0 / 61234     | 0 / 53526      | 0 / 56896      | 0 / 19882         |
| Reference period                                  | 9 / 991491                      | 4 / 902106    | 7 / 866417     | 4 / 747729     | 2 / 279451        |
| <b>Encephalomyelitis or encephalitis</b>          |                                 |               |                |                |                   |
| Bivalent boosters                                 | 6 / 69061                       | 3 / 61221     | 4 / 53518      | 4 / 56885      | 1 / 19879         |
| Reference period                                  | 29 / 991347                     | 38 / 901930   | 32 / 866291    | 25 / 747576    | 10 / 279410       |
| <b>Narcolepsy</b>                                 |                                 |               |                |                |                   |
| Bivalent boosters                                 | 0 / 69066                       | 0 / 61230     | 0 / 53521      | 0 / 56893      | NE                |
| Reference period                                  | 5 / 991426                      | 2 / 902058    | 5 / 866351     | 2 / 747695     | NE                |
| <b>Appendicitis</b>                               |                                 |               |                |                |                   |
| Bivalent boosters                                 | 71 / 68714                      | 55 / 60961    | 46 / 53257     | 56 / 56623     | 24 / 19795        |
| Reference period                                  | 1067 / 986842                   | 844 / 898443  | 870 / 862454   | 766 / 744469   | 275 / 278362      |
| <b>Aseptic arthritis</b>                          |                                 |               |                |                |                   |
| Bivalent boosters                                 | 86 / 68542                      | 129 / 60312   | 64 / 53104     | 95 / 56207     | 56 / 19544        |
| Reference period                                  | 1169 / 984199                   | 2044 / 889449 | 1074 / 859993  | 1381 / 738857  | 758 / 274798      |



**Supplemental Table S3. Number of events and person-years within 28 days after vaccination with a bivalent omicron adapted mRNA-booster vaccine as the fourth dose in Danish 50+-year-olds during 15 September 2022 to 10 December 2022 by sex and age.**

| Outcome event / subgroup        | Number of events / person-years |                |                |                |                   |
|---------------------------------|---------------------------------|----------------|----------------|----------------|-------------------|
|                                 | Female                          | Male           | 50 to 64 years | 65 to 79 years | 80 years or older |
| <b>Type 1 diabetes mellitus</b> |                                 |                |                |                |                   |
| Bivalent boosters               | 6 / 68604                       | 18 / 60637     | 13 / 53018     | 6 / 56448      | 5 / 19775         |
| Reference period                | 221 / 985032                    | 338 / 893587   | 268 / 859010   | 225 / 741687   | 66 / 277921       |
| <b>Subacute thyroiditis</b>     |                                 |                |                |                |                   |
| Bivalent boosters               | 8 / 69043                       | 8 / 61222      | 4 / 53500      | 11 / 56886     | 1 / 19880         |
| Reference period                | 90 / 991095                     | 48 / 901951    | 87 / 866015    | 42 / 747609    | 9 / 279422        |
| <b>Heart failure</b>            |                                 |                |                |                |                   |
| Bivalent boosters               | 193 / 68101                     | 320 / 59476    | 83 / 53055     | 230 / 55598    | 200 / 18925       |
| Reference period                | 3274 / 978071                   | 5135 / 877652  | 1376 / 859389  | 3613 / 730468  | 3420 / 265866     |
| <b>Arrhythmia</b>               |                                 |                |                |                |                   |
| Bivalent boosters               | 655 / 65096                     | 875 / 55862    | 274 / 52072    | 791 / 52230    | 465 / 16656       |
| Reference period                | 9247 / 938393                   | 12395 / 830931 | 4362 / 845493  | 10470 / 688849 | 6810 / 234982     |
| <b>Acute liver failure</b>      |                                 |                |                |                |                   |
| Bivalent boosters               | 5 / 69028                       | 5 / 61196      | 3 / 53500      | 3 / 56856      | 4 / 19869         |
| Reference period                | 171 / 990873                    | 204 / 901549   | 132 / 865997   | 182 / 747160   | 61 / 279265       |
| <b>Acute kidney failure</b>     |                                 |                |                |                |                   |
| Bivalent boosters               | 116 / 68599                     | 120 / 60652    | 47 / 53306     | 113 / 56377    | 76 / 19568        |
| Reference period                | 1750 / 984823                   | 2069 / 893719  | 729 / 862895   | 1763 / 740653  | 1327 / 274994     |
| <b>Acute pancreatitis</b>       |                                 |                |                |                |                   |
| Bivalent boosters               | 38 / 68902                      | 39 / 61047     | 16 / 53409     | 35 / 56734     | 26 / 19806        |
| Reference period                | 593 / 989234                    | 663 / 899594   | 415 / 864657   | 521 / 745705   | 320 / 278466      |
| <b>Erythema multiforme</b>      |                                 |                |                |                |                   |
| Bivalent boosters               | 0 / 69068                       | 1 / 61231      | 0 / 53525      | 1 / 56893      | 0 / 19880         |
| Reference period                | 22 / 991455                     | 14 / 902073    | 8 / 866412     | 17 / 747691    | 11 / 279425       |

**Supplemental Table S3. Number of events and person-years within 28 days after vaccination with a bivalent omicron adapted mRNA-booster vaccine as the fourth dose in Danish 50+-year-olds during 15 September 2022 to 10 December 2022 by sex and age.**

| Outcome event / subgroup | Number of events / person-years |               |                |                |                   |
|--------------------------|---------------------------------|---------------|----------------|----------------|-------------------|
|                          | Female                          | Male          | 50 to 64 years | 65 to 79 years | 80 years or older |
| <b>Seizure</b>           |                                 |               |                |                |                   |
| Bivalent boosters        | 47 / 68603                      | 64 / 60713    | 24 / 53162     | 67 / 56457     | 20 / 19698        |
| Reference period         | 805 / 984905                    | 983 / 894747  | 583 / 860954   | 833 / 741864   | 372 / 276834      |
| <b>Arterial aneurysm</b> |                                 |               |                |                |                   |
| Bivalent boosters        | 76 / 68683                      | 222 / 60146   | 70 / 53285     | 158 / 56066    | 70 / 19477        |
| Reference period         | 1005 / 986383                   | 2561 / 887920 | 759 / 863051   | 1972 / 737299  | 835 / 273952      |
| <b>Uveitis</b>           |                                 |               |                |                |                   |
| Bivalent boosters        | 19 / 68942                      | 12 / 61136    | 11 / 53432     | 12 / 56798     | 8 / 19848         |
| Reference period         | 340 / 989707                    | 282 / 900711  | 272 / 864929   | 249 / 746478   | 101 / 279011      |

NE denotes not estimable. Each outcome was studied separately, which is why there may be slight differences in the denominators due to different exclusions. The sum of person-years within different strata may not equal the total person-years exactly because of rounding. <sup>a</sup>The corresponding incidence rate ratios with 95% confidence intervals are shown in Figure 3 and 4.

**Supplementary Table S4: Number of events and person-years within 28 days after vaccination with a bivalent omicron adapted vaccine as a fourth dose by type of vaccine and reference period in Danish 50+ year-olds during 15 September 2022 to 10 December 2022.<sup>a</sup>**

| Outcome event                              | Number of events / person-years |                     |                     |                   |
|--------------------------------------------|---------------------------------|---------------------|---------------------|-------------------|
|                                            | BNT BA.4-5-containing           | BNT BA.1-containing | MOD BA.1-containing | Reference period  |
| Anaphylaxis                                | 22 / 85780.6                    | 7 / 40100.1         | 1 / 4278.8          | 363 / 1891644.8   |
| Ischemic cardiac event                     | 425 / 83391.3                   | 227 / 38670.0       | 20 / 4134.8         | 9992 / 1838445.5  |
| Cerebrovascular event                      | 468 / 84037.0                   | 305 / 38670.9       | 25 / 4176.9         | 11523 / 1847731.6 |
| Arterial thromboembolism                   | 17 / 85808.8                    | 4 / 40112.2         | 0 / 4280.3          | 385 / 1892133.7   |
| Deep vein thrombosis                       | 140 / 85065.6                   | 90 / 39674.8        | 7 / 4247.2          | 3593 / 1875648.1  |
| Pulmonary embolism                         | 125 / 85349.3                   | 86 / 39774.9        | 5 / 4253.2          | 3336 / 1881117.3  |
| Myocarditis or pericarditis                | 18 / 85799.8                    | 9 / 40116.3         | 2 / 4280.8          | 322 / 1892114.4   |
| Cerebral venous thrombosis                 | 2 / 85864.3                     | 1 / 40148.7         | 0 / 4283.3          | 37 / 1893510.4    |
| Thrombocytopenia and coagulative disorders | 18 / 85748.0                    | 10 / 40077.3        | 2 / 4277.4          | 489 / 1890679.3   |
| Guillain-Barré syndrome                    | 1 / 85860.5                     | 0 / 40147.6         | 0 / 4283.4          | 48 / 1893425.3    |
| Bell's palsy                               | 19 / 85777.8                    | 9 / 40106.3         | 1 / 4278.7          | 449 / 1891679.3   |
| Transverse myelitis                        | NE                              | NE                  | NE                  | 13 / 1893596.9    |
| Encephalomyelitis or encephalitis          | 6 / 85857.0                     | 2 / 40141.9         | 1 / 4283.1          | 67 / 1893277.3    |
| Narcolepsy                                 | NE                              | NE                  | NE                  | 7 / 1893483.6     |
| Appendicitis                               | 81 / 85457.2                    | 39 / 39953.9        | 6 / 4263.6          | 1911 / 1885284.3  |
| Aseptic arthritis                          | 123 / 85007.9                   | 87 / 39608.3        | 5 / 4238.1          | 3213 / 1873648.6  |
| Type 1 diabetes mellitus                   | 13 / 85188.1                    | 10 / 39809.1        | 1 / 4244.2          | 559 / 1878618.9   |
| Subacute thyroiditis                       | 10 / 85841.3                    | 6 / 40141.7         | 0 / 4282.4          | 138 / 1893045.7   |
| Heart failure                              | 305 / 84375.4                   | 200 / 39005.9       | 8 / 4196.3          | 8409 / 1855723.5  |
| Arrhythmia                                 | 925 / 80698.5                   | 561 / 36316.3       | 44 / 3943.1         | 21642 / 1769323.7 |
| Acute liver failure                        | 7 / 85821.6                     | 3 / 40122.7         | 0 / 4280.1          | 375 / 1892421.8   |
| Acute kidney failure                       | 124 / 85300.9                   | 103 / 39704.3       | 9 / 4245.7          | 3819 / 1878542.3  |
| Acute pancreatitis                         | 43 / 85654.8                    | 30 / 40021.5        | 4 / 4272.8          | 1256 / 1888827.6  |
| Erythema multiforme                        | 1 / 85866.0                     | 0 / 40148.9         | 0 / 4283.6          | 36 / 1893528.2    |

**Supplementary Table S4: Number of events and person-years within 28 days after vaccination with a bivalent omicron adapted vaccine as a fourth dose by type of vaccine and reference period in Danish 50+ year-olds during 15 September 2022 to 10 December 2022.<sup>a</sup>**

| Outcome event     | Number of events / person-years |                     |                     |                  |
|-------------------|---------------------------------|---------------------|---------------------|------------------|
|                   | BNT BA.4-5-containing           | BNT BA.1-containing | MOD BA.1-containing | Reference period |
| Seizure           | 55 / 85326.4                    | 53 / 39735.5        | 3 / 4254.2          | 1788 / 1879652.3 |
| Arterial aneurysm | 180 / 85021.6                   | 106 / 39579.0       | 12 / 4228.2         | 3566 / 1874302.8 |
| Uveitis           | 19 / 85722.3                    | 12 / 40077.7        | 0 / 4277.7          | 622 / 1890418.3  |

BNT denotes BNT162b2, MOD mRNA-1273, and NE not estimable. Each outcome was studied separately, which is why there may be slight differences in the denominators due to different exclusions. The sum of person-years within different strata may not equal the total person-years exactly because of rounding. <sup>a</sup>The corresponding incidence rate ratios with 95% confidence intervals are shown in Figure 5.

**Supplementary Table S5: Risk of adverse events within 28 days after vaccination with a bivalent omicron adapted mRNA-booster vaccine as the fourth dose in Danish 50+ year-olds during 15 September 2022 to 10 December 2022 using an alternative analytical approach of a self-controlled case series design.**

| Outcome event                            | Number of events / person-years |                  | Incidence rate ratio (95% CI) |
|------------------------------------------|---------------------------------|------------------|-------------------------------|
|                                          | Bivalent boosters               | Reference period |                               |
| Anaphylaxis                              | 30 / 47.6                       | 347 / 673.7      | 1.05 (0.67 to 1.65)           |
| Ischemic cardiac event                   | 672 / 1354.5                    | 9726 / 18814.4   | 0.92 (0.84 to 1.01)           |
| Cerebrovascular event                    | 798 / 1329.4                    | 11291 / 19290.0  | 0.96 (0.89 to 1.05)           |
| Arterial thromboembolism                 | 21 / 38.8                       | 371 / 621.2      | 1.15 (0.67 to 1.96)           |
| Deep vein thrombosis                     | 237 / 448.4                     | 3460 / 6502.5    | 1.01 (0.86 to 1.18)           |
| Pulmonary embolism                       | 216 / 369.8                     | 3234 / 5518.4    | 0.85 (0.72 to 1.00)           |
| Myocarditis or pericarditis              | 29 / 38.6                       | 314 / 597.8      | 1.52 (0.94 to 2.45)           |
| Cerebral venous thrombosis               | 3 / 4.5                         | 36 / 64.3        | 1.49 (0.31 to 7.10)           |
| Thrombocytopenia or coagulative disorder | 30 / 52.9                       | 466 / 834.7      | 0.87 (0.57 to 1.34)           |
| Guillain-Barré syndrome                  | 1 / 4.4                         | 48 / 71.5        | 0.20 (0.03 to 1.57)           |
| Bell's palsy                             | 29 / 53.9                       | 435 / 793.4      | 0.96 (0.62 to 1.51)           |
| Transverse myelitis                      | 0 / 1.9                         | 13 / 26.7        | NE                            |
| Encephalomyelitis or encephalitis        | 9 / 7.7                         | 66 / 125.1       | 1.66 (0.68 to 4.07)           |
| Narcolepsy                               | 0 / 1.0                         | 6 / 14.3         | NE                            |
| Appendicitis                             | 126 / 260.6                     | 1856 / 3607.4    | 0.97 (0.78 to 1.21)           |
| Aseptic arthritis                        | 215 / 431.6                     | 3090 / 6130.2    | 0.92 (0.78 to 1.09)           |
| Type 1 diabetes mellitus                 | 24 / 72.0                       | 538 / 1038.5     | 0.81 (0.50 to 1.31)           |
| Subacute thyroiditis                     | 16 / 16.6                       | 131 / 257.1      | 1.97 (0.99 to 3.91)           |
| Heart failure                            | 513 / 921.7                     | 8160 / 13543.2   | 0.80 (0.72 to 0.89)           |
| Arrhythmia                               | 1530 / 2777.5                   | 20846 / 38150.4  | 0.93 (0.87 to 0.99)           |
| Acute liver failure                      | 10 / 31.6                       | 368 / 533.3      | 0.37 (0.19 to 0.74)           |
| Acute kidney failure                     | 236 / 362.7                     | 3736 / 5670.7    | 0.79 (0.68 to 0.92)           |
| Acute pancreatitis                       | 77 / 146.5                      | 1224 / 2107.8    | 0.82 (0.63 to 1.07)           |
| Erythema multiforme                      | 1 / 3.7                         | 36 / 59.7        | 0.43 (0.05 to 3.76)           |
| Seizure                                  | 111 / 210.1                     | 1707 / 3053.6    | 0.89 (0.71 to 1.12)           |
| Arterial aneurysm                        | 298 / 468.9                     | 3429 / 6322.4    | 0.94 (0.82 to 1.09)           |
| Uveitis                                  | 31 / 76.8                       | 600 / 1124.9     | 0.97 (0.63 to 1.49)           |

NE denotes not estimable. Each outcome was studied separately, which is why there may be slight differences in the denominators due to different exclusions.

**Supplementary Table S6: Risk of adverse events within 28 days after vaccination with a bivalent omicron adapted mRNA-booster vaccine as the fourth dose in Danish 50+ year-olds during 15 September 2022 to 10 December 2022 using an alternative analytical approach of an observed vs expected design.**

| Outcome event                            | Number of observed /<br>expected events | Rate ratio (95% CI) |
|------------------------------------------|-----------------------------------------|---------------------|
|                                          | Bivalent boosters                       |                     |
| Anaphylaxis                              | 30 / 30.3                               | 0.99 (0.67 to 1.41) |
| Ischemic cardiac event                   | 672 / 801.6                             | 0.84 (0.78 to 0.90) |
| Cerebrovascular event                    | 798 / 761.0                             | 1.05 (0.98 to 1.12) |
| Arterial thromboembolism                 | 21 / 33.1                               | 0.63 (0.39 to 0.97) |
| Deep vein thrombosis                     | 237 / 293.3                             | 0.81 (0.71 to 0.92) |
| Pulmonary embolism                       | 216 / 230.6                             | 0.94 (0.82 to 1.07) |
| Myocarditis or pericarditis              | 29 / 22.6                               | 1.28 (0.86 to 1.84) |
| Cerebral venous thrombosis               | 3 / 2.3                                 | 1.28 (0.26 to 3.74) |
| Thrombocytopenia or coagulative disorder | 30 / 49.1                               | 0.61 (0.41 to 0.87) |
| Guillain-Barré syndrome                  | 1 / 3.9                                 | 0.26 (0.01 to 1.42) |
| Bell's palsy                             | 29 / 27.9                               | 1.04 (0.70 to 1.49) |
| Transverse myelitis                      | 0 / 1.0                                 | NE                  |
| Encephalomyelitis or encephalitis        | 9 / 6.9                                 | 1.30 (0.59 to 2.46) |
| Narcolepsy                               | 0 / 2.2                                 | NE                  |
| Appendicitis                             | 126 / 115.5                             | 1.09 (0.91 to 1.30) |
| Aseptic arthritis                        | 215 / 282.4                             | 0.76 (0.66 to 0.87) |
| Type 1 diabetes mellitus                 | 24 / 157.5                              | 0.15 (0.10 to 0.23) |
| Subacute thyroiditis                     | 16 / 6.9                                | 2.31 (1.32 to 3.75) |
| Heart failure                            | 513 / 610.2                             | 0.84 (0.77 to 0.92) |
| Arrhythmia                               | 1530 / 1478.1                           | 1.04 (0.98 to 1.09) |
| Acute liver failure                      | 10 / 33.0                               | 0.30 (0.15 to 0.56) |
| Acute kidney failure                     | 236 / 231.8                             | 1.02 (0.89 to 1.16) |
| Acute pancreatitis                       | 77 / 77.0                               | 1.00 (0.79 to 1.25) |
| Erythema multiforme                      | 1 / 2.9                                 | 0.35 (0.01 to 1.95) |
| Seizure                                  | 111 / 168.1                             | 0.66 (0.54 to 0.80) |
| Arterial aneurysm                        | 298 / 255.5                             | 1.17 (1.04 to 1.31) |
| Uveitis                                  | 31 / 39.9                               | 0.78 (0.53 to 1.10) |

NE denotes not estimable. Each outcome was studied separately, which is why there may be slight differences in the denominators due to different exclusions. Expected rates were estimated using indirect age- and sex standardization of the historic background rates within the Danish general population from 1 January 2018 to 31 December 2019 (with a washout period of the respective outcome from 1 January 2015 to 31 December 2017),

**Supplementary Table S7: Risk of severe adverse events (hospitalization for ≥5 hours) within 28 days after vaccination with a bivalent omicron adapted vaccine as a fourth dose in Danish 50+ year-olds during 15 September 2022 to 10 December 2022.**

| Outcome event                                  | Number of events / person-years |                  | Incidence rate ratio (95% CI) |
|------------------------------------------------|---------------------------------|------------------|-------------------------------|
|                                                | Bivalent boosters               | Reference period |                               |
| Anaphylaxis                                    | 20 / 130178                     | 217 / 1891849    | 1.16 (0.68 to 2.01)           |
| Ischemic cardiac event                         | 513 / 126464                    | 8188 / 1841576   | 0.90 (0.81 to 1.00)           |
| Cerebrovascular event                          | 683 / 127072                    | 9990 / 1849868   | 0.94 (0.86 to 1.03)           |
| Arterial thromboembolism                       | 14 / 130212                     | 271 / 1892266    | 0.91 (0.49 to 1.70)           |
| Deep vein thrombosis                           | 88 / 129263                     | 1327 / 1878842   | 0.97 (0.76 to 1.25)           |
| Pulmonary embolism                             | 148 / 129461                    | 2556 / 1882073   | 0.75 (0.62 to 0.91)           |
| Myocarditis or pericarditis                    | 20 / 130204                     | 263 / 1892203    | 1.18 (0.69 to 2.03)           |
| Cerebral venous thrombosis                     | 3 / 130297                      | 29 / 1893523     | 2.10 (0.43 to 10.15)          |
| Thrombocytopenia and coagulative disorders     | 9 / 130135                      | 220 / 1891056    | 0.70 (0.33 to 1.48)           |
| Guillain-Barré syndrome                        | 1 / 130292                      | 41 / 1893436     | 0.23 (0.03 to 1.84)           |
| Bell's palsy                                   | 11 / 130193                     | 166 / 1892014    | 1.16 (0.56 to 2.41)           |
| Transverse myelitis                            | 0 / 130305                      | 5 / 1893609      | NE                            |
| Encephalomyelitis or encephalitis <sup>a</sup> | 9 / 130284                      | 50 / 1893304     | 2.67 (1.01 to 7.07)           |
| Appendicitis                                   | 126 / 129677                    | 1897 / 1885316   | 1.03 (0.83 to 1.27)           |
| Aseptic arthritis                              | 40 / 129171                     | 786 / 1877282    | 0.78 (0.54 to 1.12)           |
| Type 1 diabetes mellitus                       | 4 / 129297                      | 133 / 1879275    | 0.70 (0.23 to 2.16)           |
| Subacute thyroiditis                           | 0 / 130280                      | 6 / 1893231      | NE                            |
| Heart failure                                  | 317 / 127945                    | 5418 / 1859868   | 0.75 (0.66 to 0.85)           |
| Arrhythmia                                     | 904 / 122126                    | 12768 / 1782238  | 0.90 (0.83 to 0.98)           |
| Acute liver failure                            | 9 / 130238                      | 260 / 1892577    | 0.45 (0.22 to 0.93)           |
| Acute kidney failure                           | 188 / 129322                    | 3183 / 1879340   | 0.75 (0.64 to 0.89)           |
| Acute pancreatitis                             | 74 / 129955                     | 1209 / 1888900   | 0.82 (0.62 to 1.07)           |
| Erythema multiforme                            | 0 / 130300                      | 19 / 1893553     | NE                            |
| Seizure                                        | 59 / 129434                     | 830 / 1881012    | 0.91 (0.67 to 1.24)           |
| Arterial aneurysm                              | 76 / 129152                     | 1017 / 1877798   | 1.00 (0.76 to 1.31)           |
| Uveitis                                        | 6 / 130142                      | 67 / 1891200     | 1.35 (0.49 to 3.74)           |

NE denotes not estimable. Each outcome was studied separately, which is why there may be slight differences in the denominators due to different exclusions. <sup>a</sup>The rate ratio for encephalomyelitis or encephalitis was 1.62 (95% CI 0.74-3.07) and 2.77 (95% CI 0.99-7.75) with use of observed vs. expected and self-controlled case series analysis, respectively.

**Supplementary Table S8: Sensitivity analysis of the associated risk of adverse events within 28 days following fourth dose bivalent omicron adapted booster vaccination including both primary and secondary diagnoses in the outcome definitions.**

| Outcome                                    | Number of events / person-years |                  | Incidence rate ratio<br>(95% CI) |
|--------------------------------------------|---------------------------------|------------------|----------------------------------|
|                                            | Bivalent boosters               | Reference period |                                  |
| Anaphylaxis                                | 31 / 130156                     | 400 / 1891605    | 0.92 (0.60 to 1.39)              |
| Ischemic cardiac event                     | 742 / 126093                    | 10864 / 1837213  | 0.96 (0.88 to 1.04)              |
| Cerebrovascular event                      | 875 / 126740                    | 12807 / 1846000  | 0.95 (0.88 to 1.03)              |
| Arterial thromboembolism                   | 22 / 130197                     | 425 / 1892073    | 0.88 (0.54 to 1.45)              |
| Deep vein thrombosis                       | 258 / 128938                    | 4069 / 1875052   | 0.93 (0.80 to 1.08)              |
| Pulmonary embolism                         | 238 / 129339                    | 3839 / 1880619   | 0.80 (0.69 to 0.93)              |
| Myocarditis or pericarditis                | 32 / 130192                     | 379 / 1892054    | 1.28 (0.83 to 1.97)              |
| Cerebral venous thrombosis                 | 3 / 130296                      | 40 / 1893506     | 1.58 (0.36 to 6.92)              |
| Thrombocytopenia and coagulative disorders | 45 / 130087                     | 700 / 1890477    | 0.81 (0.57 to 1.14)              |
| Guillain-Barré syndrome                    | 3 / 130291                      | 55 / 1893417     | 0.64 (0.18 to 2.30)              |
| Bell's palsy                               | 29 / 130160                     | 472 / 1891644    | 0.94 (0.61 to 1.45)              |
| Transverse myelitis                        | 1 / 130303                      | 14 / 1893595     | 1.10 (0.10 to 12.18)             |
| Encephalomyelitis or encephalitis          | 11 / 130280                     | 77 / 1893261     | 1.80 (0.81 to 4.00)              |
| Narcolepsy                                 | 2 / 130295                      | 14 / 1893476     | 1.05 (0.19 to 5.73)              |
| Appendicitis                               | 129 / 129670                    | 1953 / 1885224   | 1.01 (0.82 to 1.25)              |
| Aseptic arthritis                          | 251 / 128767                    | 3953 / 1872615   | 0.85 (0.73 to 0.98)              |
| Type 1 diabetes mellitus                   | 41 / 129197                     | 936 / 1878074    | 0.80 (0.56 to 1.14)              |
| Subacute thyroiditis                       | 17 / 130265                     | 143 / 1893038    | 1.60 (0.86 to 2.98)              |
| Heart failure                              | 609 / 127366                    | 10584 / 1853124  | 0.74 (0.68 to 0.82)              |
| Arrhythmia                                 | 1903 / 120307                   | 27536 / 1761569  | 0.91 (0.87 to 0.96)              |
| Acute liver failure                        | 15 / 130219                     | 498 / 1892336    | 0.43 (0.25 to 0.75)              |
| Acute kidney failure                       | 386 / 129071                    | 6185 / 1876334   | 0.81 (0.72 to 0.91)              |
| Acute pancreatitis                         | 83 / 129939                     | 1358 / 1888695   | 0.80 (0.62 to 1.03)              |
| Erythema multiforme                        | 1 / 130298                      | 41 / 1893522     | 0.40 (0.05 to 3.36)              |
| Seizure                                    | 128 / 129282                    | 2084 / 1879244   | 0.87 (0.71 to 1.07)              |
| Arterial aneurysm                          | 335 / 128752                    | 4149 / 1873400   | 0.95 (0.83 to 1.08)              |
| Uveitis                                    | 32 / 130073                     | 653 / 1890363    | 0.85 (0.57 to 1.28)              |



**Supplementary Table S9. Risk of adverse events after vaccination with a bivalent omicron adapted mRNA-booster vaccine as the fourth dose in Danish 50+ year-olds during 15 September 2022 to 10 December 2022 with use of alternative risk periods.**

| Alternative risk period/outcome                                              | Number of events / person-years |                  | Incidence rate ratio (95% CI) |
|------------------------------------------------------------------------------|---------------------------------|------------------|-------------------------------|
|                                                                              | Bivalent boosters               | Reference period |                               |
| <b>Risk period restricted to the first 7 days after fourth vaccine dose</b>  |                                 |                  |                               |
| Anaphylaxis                                                                  | 7 / 33083                       | 398 / 2115427    | 0.93 (0.43 to 2.00)           |
| Ischemic cardiac event                                                       | 148 / 32081                     | 11217 / 2055979  | 0.83 (0.70 to 0.98)           |
| Cerebrovascular event                                                        | 166 / 32256                     | 12902 / 2066397  | 0.79 (0.67 to 0.92)           |
| Arterial thromboembolism                                                     | 6 / 33093                       | 428 / 2115978    | 1.09 (0.47 to 2.50)           |
| Deep vein thrombosis                                                         | 60 / 32786                      | 3998 / 2097555   | 0.97 (0.74 to 1.26)           |
| Pulmonary embolism                                                           | 35 / 32886                      | 3768 / 2103658   | 0.55 (0.39 to 0.77)           |
| Myocarditis or pericarditis                                                  | 9 / 33092                       | 368 / 2115955    | 1.55 (0.77 to 3.09)           |
| Cerebral venous thrombosis                                                   | 2 / 33117                       | 43 / 2117512     | 4.43 (0.89 to 22.12)          |
| Thrombocytopenia or coagulative disorder                                     | 9 / 33068                       | 536 / 2114346    | 0.96 (0.49 to 1.89)           |
| Guillain-Barré syndrome                                                      | 0 / 33116                       | 56 / 2117417     | NE                            |
| Bell's palsy                                                                 | 10 / 33084                      | 495 / 2115469    | 1.36 (0.71 to 2.62)           |
| Transverse myelitis                                                          | 0 / 33119                       | 13 / 2117610     | NE                            |
| Encephalomyelitis or encephalitis                                            | 1 / 33114                       | 79 / 2117253     | 0.56 (0.07 to 4.12)           |
| Narcolepsy                                                                   | 0 / 33117                       | 7 / 2117482      | NE                            |
| Appendicitis                                                                 | 33 / 32960                      | 2118 / 2108328   | 1.04 (0.73 to 1.48)           |
| Aseptic arthritis                                                            | 56 / 32752                      | 3616 / 2095306   | 0.94 (0.71 to 1.23)           |
| Type 1 diabetes mellitus                                                     | 12 / 32850                      | 611 / 2100857    | 1.72 (0.94 to 3.15)           |
| Subacute thyroiditis                                                         | 4 / 33109                       | 162 / 2116997    | 1.41 (0.50 to 3.96)           |
| Heart failure                                                                | 127 / 32430                     | 9345 / 2075325   | 0.82 (0.69 to 0.98)           |
| Arrhythmia                                                                   | 352 / 30760                     | 24219 / 1978552  | 0.86 (0.77 to 0.95)           |
| Acute liver failure                                                          | 4 / 33099                       | 404 / 2116300    | 0.73 (0.27 to 2.01)           |
| Acute kidney failure                                                         | 45 / 32853                      | 4213 / 2100785   | 0.61 (0.45 to 0.83)           |
| Acute pancreatitis                                                           | 19 / 33029                      | 1392 / 2112285   | 0.84 (0.52 to 1.33)           |
| Erythema multiforme                                                          | 0 / 33118                       | 42 / 2117532     | NE                            |
| Seizure                                                                      | 34 / 32869                      | 1985 / 2102039   | 1.08 (0.76 to 1.54)           |
| Arterial aneurysm                                                            | 62 / 32748                      | 4025 / 2095996   | 0.81 (0.62 to 1.04)           |
| Uveitis                                                                      | 4 / 33062                       | 689 / 2114067    | 0.45 (0.16 to 1.21)           |
| <b>Risk period restricted to the first 14 days after fourth vaccine dose</b> |                                 |                  |                               |
| Anaphylaxis                                                                  | 14 / 65919                      | 388 / 2040463    | 0.92 (0.52 to 1.62)           |
| Ischemic cardiac event                                                       | 319 / 63920                     | 10833 / 1983109  | 0.89 (0.79 to 1.00)           |

**Supplementary Table S9. Risk of adverse events after vaccination with a bivalent omicron adapted mRNA-booster vaccine as the fourth dose in Danish 50+ year-olds during 15 September 2022 to 10 December 2022 with use of alternative risk periods.**

| Alternative risk period/outcome                                  | Number of events / person-years |                  | Incidence rate ratio (95% CI) |
|------------------------------------------------------------------|---------------------------------|------------------|-------------------------------|
|                                                                  | Bivalent boosters               | Reference period |                               |
| Cerebrovascular event                                            | 386 / 64268                     | 12436 / 1993146  | 0.92 (0.83 to 1.03)           |
| Arterial thromboembolism                                         | 12 / 65940                      | 415 / 2040993    | 1.11 (0.60 to 2.06)           |
| Deep vein thrombosis                                             | 120 / 65328                     | 3863 / 2023219   | 0.97 (0.80 to 1.17)           |
| Pulmonary embolism                                               | 103 / 65526                     | 3614 / 2029108   | 0.82 (0.66 to 1.00)           |
| Myocarditis or pericarditis                                      | 20 / 65938                      | 351 / 2040972    | 1.88 (1.13 to 3.11)           |
| Cerebral venous thrombosis                                       | 3 / 65988                       | 38 / 2042474     | 3.78 (0.88 to 16.17)          |
| Thrombocytopenia or coagulative disorder                         | 18 / 65891                      | 516 / 2039421    | 0.96 (0.58 to 1.58)           |
| Guillain-Barré syndrome                                          | 0 / 65986                       | 55 / 2042383     | NE                            |
| Bell's palsy                                                     | 15 / 65921                      | 480 / 2040502    | 1.00 (0.58 to 1.73)           |
| Transverse myelitis                                              | 0 / 65992                       | 13 / 2042568     | NE                            |
| Encephalomyelitis or encephalitis                                | 4 / 65981                       | 76 / 2042224     | 1.18 (0.40 to 3.47)           |
| Narcolepsy                                                       | 0 / 65988                       | 7 / 2042446      | NE                            |
| Appendicitis                                                     | 68 / 65675                      | 2044 / 2033610   | 1.08 (0.84 to 1.40)           |
| Aseptic arthritis                                                | 109 / 65260                     | 3478 / 2021054   | 0.90 (0.74 to 1.11)           |
| Type 1 diabetes mellitus                                         | 17 / 65455                      | 594 / 2026411    | 1.20 (0.71 to 2.02)           |
| Subacute thyroiditis                                             | 8 / 65972                       | 153 / 2041976    | 1.46 (0.67 to 3.17)           |
| Heart failure                                                    | 259 / 64616                     | 9035 / 2001763   | 0.83 (0.72 to 0.94)           |
| Arrhythmia                                                       | 744 / 61282                     | 23357 / 1908464  | 0.90 (0.83 to 0.97)           |
| Acute liver failure                                              | 8 / 65952                       | 389 / 2041304    | 0.72 (0.35 to 1.51)           |
| Acute kidney failure                                             | 115 / 65460                     | 4079 / 2026337   | 0.78 (0.64 to 0.95)           |
| Acute pancreatitis                                               | 37 / 65813                      | 1348 / 2037430   | 0.80 (0.57 to 1.13)           |
| Erythema multiforme                                              | 0 / 65989                       | 41 / 2042494     | NE                            |
| Seizure                                                          | 53 / 65492                      | 1931 / 2027542   | 0.82 (0.61 to 1.09)           |
| Arterial aneurysm                                                | 147 / 65250                     | 3862 / 2021732   | 0.97 (0.81 to 1.15)           |
| Uveitis                                                          | 9 / 65877                       | 672 / 2039147    | 0.49 (0.25 to 0.96)           |
| <b>Risk period extended to 90 days after fourth vaccine dose</b> |                                 |                  |                               |
| Anaphylaxis                                                      | 57 / 262345                     | 272 / 1384066    | 0.85 (0.56 to 1.29)           |
| Ischemic cardiac event                                           | 1381 / 254126                   | 7156 / 1344999   | 0.92 (0.84 to 1.00)           |
| Cerebrovascular event                                            | 1623 / 255346                   | 8439 / 1351895   | 0.85 (0.78 to 0.92)           |
| Arterial thromboembolism                                         | 34 / 262429                     | 291 / 1384423    | 0.49 (0.30 to 0.81)           |
| Deep vein thrombosis                                             | 471 / 259910                    | 2633 / 1372343   | 0.85 (0.74 to 0.99)           |

**Supplementary Table S9. Risk of adverse events after vaccination with a bivalent omicron adapted mRNA-booster vaccine as the fourth dose in Danish 50+ year-olds during 15 September 2022 to 10 December 2022 with use of alternative risk periods.**

| Alternative risk period/outcome          | Number of events / person-years |                  | Incidence rate ratio (95% CI) |
|------------------------------------------|---------------------------------|------------------|-------------------------------|
|                                          | Bivalent boosters               | Reference period |                               |
| Pulmonary embolism                       | 462 / 260687                    | 2337 / 1376399   | 0.76 (0.65 to 0.88)           |
| Myocarditis or pericarditis              | 47 / 262424                     | 240 / 1384406    | 0.94 (0.59 to 1.50)           |
| Cerebral venous thrombosis               | 4 / 262627                      | 28 / 1385436     | 0.79 (0.18 to 3.56)           |
| Thrombocytopenia or coagulative disorder | 65 / 262228                     | 364 / 1383377    | 0.66 (0.45 to 0.96)           |
| Guillain-Barré syndrome                  | 4 / 262617                      | 41 / 1385374     | 0.26 (0.08 to 0.86)           |
| Bell's palsy                             | 58 / 262356                     | 358 / 1384079    | 0.92 (0.61 to 1.40)           |
| Transverse myelitis                      | 0 / 262642                      | 8 / 1385498      | NE                            |
| Encephalomyelitis or encephalitis        | 10 / 262596                     | 52 / 1385265     | 0.48 (0.21 to 1.12)           |
| Narcolepsy                               | 0 / 262626                      | 7 / 1385415      | NE                            |
| Appendicitis                             | 239 / 261365                    | 1415 / 1379352   | 0.87 (0.71 to 1.06)           |
| Aseptic arthritis                        | 436 / 259638                    | 2409 / 1370916   | 0.74 (0.64 to 0.86)           |
| Type 1 diabetes mellitus                 | 51 / 260485                     | 404 / 1374537    | 0.73 (0.48 to 1.10)           |
| Subacute thyroiditis                     | 21 / 262567                     | 106 / 1385086    | 0.77 (0.41 to 1.47)           |
| Heart failure                            | 1189 / 256874                   | 6121 / 1357746   | 0.79 (0.72 to 0.88)           |
| Arrhythmia                               | 3246 / 242808                   | 15767 / 1294964  | 0.91 (0.85 to 0.96)           |
| Acute liver failure                      | 29 / 262479                     | 262 / 1384634    | 0.42 (0.26 to 0.69)           |
| Acute kidney failure                     | 507 / 260415                    | 2861 / 1374549   | 0.64 (0.56 to 0.74)           |
| Acute pancreatitis                       | 159 / 261907                    | 916 / 1381989    | 0.70 (0.55 to 0.89)           |
| Erythema multiforme                      | 4 / 262630                      | 27 / 1385450     | 0.83 (0.16 to 4.32)           |
| Seizure                                  | 255 / 260574                    | 1278 / 1375293   | 0.99 (0.80 to 1.22)           |
| Arterial aneurysm                        | 629 / 259535                    | 2547 / 1371468   | 1.03 (0.90 to 1.19)           |
| Uveitis                                  | 68 / 262182                     | 466 / 1383147    | 1.02 (0.69 to 1.52)           |

NE denotes not estimable. Each outcome was studied separately, which is why there may be slight differences in the denominators due to different exclusions. Day 7, 14, and 90, respectively, was used as the cut-off day to define the respective main risk and reference period for the given analysis (i.e., similar to the application of day 28 for the primary analysis; see Figure 1 for a graphical illustration of the study design for the primary analysis).

**Supplementary Table S10. Risk of adverse events within 28 days after vaccination with a bivalent omicron adapted mRNA-booster vaccine as the fourth dose in Danish 50+ year-olds during 15 September 2022 to 10 December 2022 including first SARS-CoV-2 infection as time-varying covariate.**

| Outcome                                       | Number of events / person-years |                  | Incidence rate ratio<br>(95% CI) |
|-----------------------------------------------|---------------------------------|------------------|----------------------------------|
|                                               | Bivalent boosters               | Reference period |                                  |
| Anaphylaxis                                   | 30 / 130159                     | 363 / 1891630    | 1.01 (0.66 to 1.56)              |
| Ischemic cardiac event                        | 672 / 126196                    | 9992 / 1838431   | 0.95 (0.87 to 1.04)              |
| Cerebrovascular event                         | 798 / 126885                    | 11523 / 1847717  | 0.97 (0.89 to 1.05)              |
| Arterial thromboembolism                      | 21 / 130201                     | 385 / 1892119    | 0.96 (0.57 to 1.61)              |
| Deep vein thrombosis                          | 237 / 128988                    | 3593 / 1875633   | 0.96 (0.82 to 1.12)              |
| Pulmonary embolism                            | 216 / 129377                    | 3336 / 1881102   | 0.84 (0.72 to 0.99)              |
| Myocarditis or pericarditis                   | 29 / 130197                     | 322 / 1892099    | 1.34 (0.85 to 2.13)              |
| Cerebral venous thrombosis                    | 3 / 130296                      | 37 / 1893495     | 1.61 (0.37 to 7.07)              |
| Thrombocytopenia and<br>coagulative disorders | 30 / 130103                     | 489 / 1890664    | 0.75 (0.49 to 1.13)              |
| Guillain-Barré syndrome                       | 1 / 130291                      | 48 / 1893410     | 0.19 (0.03 to 1.50)              |
| Bell's palsy                                  | 29 / 130163                     | 449 / 1891664    | 0.98 (0.63 to 1.51)              |
| Transverse myelitis                           | 0 / 130304                      | 13 / 1893582     | NE                               |
| Encephalomyelitis or encephalitis             | 9 / 130282                      | 67 / 1893262     | 1.50 (0.64 to 3.49)              |
| Narcolepsy                                    | 0 / 130296                      | 7 / 1893468      | NE                               |
| Appendicitis                                  | 126 / 129675                    | 1911 / 1885269   | 1.01 (0.82 to 1.25)              |
| Aseptic arthritis                             | 215 / 128854                    | 3213 / 1873634   | 0.88 (0.75 to 1.03)              |
| Type 1 diabetes mellitus                      | 24 / 129241                     | 559 / 1878604    | 0.78 (0.49 to 1.23)              |
| Subacute thyroiditis                          | 16 / 130265                     | 138 / 1893031    | 1.64 (0.86 to 3.11)              |
| Heart failure                                 | 513 / 127578                    | 8409 / 1855709   | 0.79 (0.71 to 0.87)              |
| Arrhythmia                                    | 1530 / 120958                   | 21642 / 1769310  | 0.93 (0.87 to 0.98)              |
| Acute liver failure                           | 10 / 130224                     | 375 / 1892407    | 0.39 (0.20 to 0.76)              |
| Acute kidney failure                          | 236 / 129251                    | 3819 / 1878527   | 0.78 (0.67 to 0.91)              |
| Acute pancreatitis                            | 77 / 129949                     | 1256 / 1888813   | 0.82 (0.63 to 1.07)              |
| Erythema multiforme                           | 1 / 130298                      | 36 / 1893513     | 0.40 (0.05 to 3.36)              |
| Seizure                                       | 111 / 129316                    | 1788 / 1879637   | 0.85 (0.68 to 1.06)              |
| Arterial aneurysm                             | 298 / 128829                    | 3566 / 1874288   | 0.99 (0.86 to 1.13)              |
| Uveitis                                       | 31 / 130078                     | 622 / 1890403    | 0.89 (0.59 to 1.35)              |

NE denotes not estimable. Each outcome was studied separately, which is why there may be slight differences in the denominators due to different exclusions. First SARS-CoV-2 infection was defined by the first registered positive PCR test for SARS-CoV-2 and treated as a time-varying covariate classified according to date of testing as uninfected, infected (day 0 to 90), and post infection (>day 90).

**Supplementary Table S11. Risk of adverse events within 28 days after vaccination with a bivalent omicron adapted mRNA-booster vaccine as the fourth dose in Danish 50+ year-olds during 15 September 2022 to 10 December 2022 with calendar month adjustment.**

| Outcome                                       | Number of events / person-years |                  | Incidence rate ratio<br>(95% CI) |
|-----------------------------------------------|---------------------------------|------------------|----------------------------------|
|                                               | Bivalent boosters               | Reference period |                                  |
| Anaphylaxis                                   | 30 / 130159                     | 363 / 1891708    | 0.94 (0.60 to 1.47)              |
| Ischemic cardiac event                        | 672 / 126196                    | 9992 / 1838509   | 0.94 (0.86 to 1.04)              |
| Cerebrovascular event                         | 798 / 126885                    | 11523 / 1847796  | 0.94 (0.86 to 1.02)              |
| Arterial thromboembolism                      | 21 / 130201                     | 385 / 1892197    | 0.95 (0.55 to 1.61)              |
| Deep vein thrombosis                          | 237 / 128988                    | 3593 / 1875711   | 0.88 (0.75 to 1.03)              |
| Pulmonary embolism                            | 216 / 129377                    | 3336 / 1881181   | 0.81 (0.69 to 0.96)              |
| Myocarditis or pericarditis                   | 29 / 130197                     | 322 / 1892178    | 1.22 (0.76 to 1.97)              |
| Cerebral venous thrombosis                    | 3 / 130296                      | 37 / 1893574     | 1.31 (0.29 to 5.89)              |
| Thrombocytopenia and<br>coagulative disorders | 30 / 130103                     | 489 / 1890743    | 0.72 (0.47 to 1.11)              |
| Guillain-Barré syndrome                       | 1 / 130291                      | 48 / 1893489     | 0.18 (0.02 to 1.47)              |
| Bell's palsy                                  | 29 / 130163                     | 449 / 1891743    | 0.98 (0.63 to 1.54)              |
| Transverse myelitis                           | 0 / 130304                      | 13 / 1893660     | NE                               |
| Encephalomyelitis or encephalitis             | 9 / 130282                      | 67 / 1893341     | 1.16 (0.49 to 2.74)              |
| Narcolepsy                                    | 0 / 130296                      | 7 / 1893547      | NE                               |
| Appendicitis                                  | 126 / 129675                    | 1911 / 1885347   | 0.92 (0.74 to 1.15)              |
| Aseptic arthritis                             | 215 / 128854                    | 3213 / 1873713   | 0.85 (0.72 to 1.01)              |
| Type 1 diabetes mellitus                      | 24 / 129241                     | 559 / 1878682    | 0.77 (0.48 to 1.23)              |
| Subacute thyroiditis                          | 16 / 130265                     | 138 / 1893109    | 1.71 (0.88 to 3.32)              |
| Heart failure                                 | 513 / 127578                    | 8409 / 1855788   | 0.78 (0.70 to 0.87)              |
| Arrhythmia                                    | 1530 / 120958                   | 21642 / 1769389  | 0.90 (0.85 to 0.96)              |
| Acute liver failure                           | 10 / 130224                     | 375 / 1892485    | 0.35 (0.17 to 0.69)              |
| Acute kidney failure                          | 236 / 129251                    | 3819 / 1878607   | 0.74 (0.64 to 0.87)              |
| Acute pancreatitis                            | 77 / 129949                     | 1256 / 1888891   | 0.78 (0.60 to 1.03)              |
| Erythema multiforme                           | 1 / 130298                      | 36 / 1893592     | 0.39 (0.04 to 3.48)              |
| Seizure                                       | 111 / 129316                    | 1788 / 1879716   | 0.83 (0.66 to 1.05)              |
| Arterial aneurysm                             | 298 / 128829                    | 3566 / 1874366   | 1.03 (0.89 to 1.19)              |
| Uveitis                                       | 31 / 130078                     | 622 / 1890482    | 0.90 (0.58 to 1.39)              |

NE denotes not estimable. Each outcome was studied separately, which is why there may be slight differences in the denominators due to different exclusions.

**Supplemental Table S12. Risk of adverse events within 28 days after vaccination with a bivalent omicron adapted mRNA-booster vaccine as the fourth dose in Danish 50+ year-olds during 15 September 2022 to 10 December 2022 as compared with two reference periods separately.**

| Outcome event                              | Number of events / person-years           |                      |                      |                               |                          |
|--------------------------------------------|-------------------------------------------|----------------------|----------------------|-------------------------------|--------------------------|
|                                            | Bivalent boosters (0-28 days of 4th dose) | Reference periods    |                      | Incidence rate ratio (95% CI) |                          |
|                                            |                                           | ≥29 days of 3rd dose | ≥29 days of 4th dose | vs. ≥29 days of 3rd dose      | vs. ≥29 days of 4th dose |
| Anaphylaxis                                | 30 / 130159                               | 336 / 1759467        | 27 / 132185          | 0.90 (0.55 to 1.46)           | 1.16 (0.69 to 1.96)      |
| Ischemic cardiac event                     | 672 / 126196                              | 9280 / 1710528       | 709 / 127929         | 0.91 (0.82 to 1.01)           | 0.99 (0.89 to 1.10)      |
| Cerebrovascular event                      | 798 / 126885                              | 10697 / 1719283      | 825 / 128461         | 0.87 (0.79 to 0.96)           | 1.06 (0.96 to 1.17)      |
| Arterial thromboembolism                   | 21 / 130201                               | 372 / 1759913        | 13 / 132227          | 0.63 (0.36 to 1.10)           | 1.75 (0.88 to 3.50)      |
| Deep vein thrombosis                       | 237 / 128988                              | 3357 / 1744733       | 234 / 130922         | 0.88 (0.74 to 1.04)           | 1.07 (0.89 to 1.28)      |
| Pulmonary embolism                         | 216 / 129377                              | 3088 / 1749816       | 246 / 131309         | 0.74 (0.62 to 0.88)           | 0.96 (0.80 to 1.15)      |
| Myocarditis or pericarditis                | 29 / 130197                               | 304 / 1759894        | 18 / 132228          | 1.16 (0.70 to 1.94)           | 1.64 (0.91 to 2.95)      |
| Cerebral venous thrombosis                 | 3 / 130296                                | 36 / 1761187         | 1 / 132330           | 1.13 (0.23 to 5.53)           | 3.08 (0.32 to 29.61)     |
| Thrombocytopenia and coagulative disorders | 30 / 130103                               | 454 / 1758561        | 35 / 132125          | 0.63 (0.40 to 0.99)           | 0.91 (0.56 to 1.48)      |
| Guillain-Barré syndrome                    | 1 / 130291                                | 45 / 1761107         | 3 / 132326           | 0.13 (0.02 to 1.07)           | 0.35 (0.04 to 3.41)      |
| Bell's palsy                               | 29 / 130163                               | 420 / 1759493        | 29 / 132193          | 0.94 (0.58 to 1.52)           | 1.02 (0.61 to 1.70)      |
| Transverse myelitis                        | 0 / 130304                                | 13 / 1761266         | NE                   | NE                            | NE                       |
| Encephalomyelitis or encephalitis          | 9 / 130282                                | 66 / 1760970         | 1 / 132314           | 0.84 (0.35 to 2.01)           | 9.42 (1.19 to 74.37)     |
| Narcolepsy                                 | 0 / 130296                                | 7 / 1761160          | NE                   | NE                            | NE                       |
| Appendicitis                               | 126 / 129675                              | 1798 / 1753600       | 113 / 131691         | 0.92 (0.73 to 1.17)           | 1.13 (0.88 to 1.46)      |
| Aseptic arthritis                          | 215 / 128854                              | 2991 / 1742873       | 221 / 130784         | 0.75 (0.63 to 0.90)           | 1.05 (0.87 to 1.26)      |

**Supplemental Table S12. Risk of adverse events within 28 days after vaccination with a bivalent omicron adapted mRNA-booster vaccine as the fourth dose in Danish 50+ year-olds during 15 September 2022 to 10 December 2022 as compared with two reference periods separately.**

| Outcome event            | Number of events / person-years           |                      |                      | Incidence rate ratio (95% CI) |                          |
|--------------------------|-------------------------------------------|----------------------|----------------------|-------------------------------|--------------------------|
|                          | Bivalent boosters (0-28 days of 4th dose) | Reference periods    |                      | vs. ≥29 days of 3rd dose      | vs. ≥29 days of 4th dose |
|                          |                                           | ≥29 days of 3rd dose | ≥29 days of 4th dose |                               |                          |
| Type 1 diabetes mellitus | 24 / 129241                               | 532 / 1747382        | 27 / 131243          | 0.69 (0.42 to 1.14)           | 0.90 (0.52 to 1.56)      |
| Subacute thyroiditis     | 16 / 130265                               | 133 / 1760751        | 5 / 132301           | 1.18 (0.60 to 2.34)           | 3.23 (1.18 to 8.82)      |
| Heart failure            | 513 / 127578                              | 7731 / 1726441       | 676 / 129297         | 0.73 (0.65 to 0.82)           | 0.85 (0.75 to 0.95)      |
| Arrythmia                | 1530 / 120958                             | 19920 / 1647495      | 1716 / 121850        | 0.89 (0.83 to 0.95)           | 0.97 (0.90 to 1.03)      |
| Acute liver failure      | 10 / 130224                               | 356 / 1760174        | 19 / 132254          | 0.30 (0.15 to 0.61)           | 0.55 (0.25 to 1.18)      |
| Acute kidney failure     | 236 / 129251                              | 3548 / 1747386       | 271 / 131164         | 0.63 (0.53 to 0.74)           | 0.97 (0.81 to 1.15)      |
| Acute pancreatitis       | 77 / 129949                               | 1174 / 1756877       | 82 / 131958          | 0.69 (0.52 to 0.92)           | 1.00 (0.73 to 1.37)      |
| Erythema multiforme      | 1 / 130298                                | 33 / 1761203         | 3 / 132332           | 0.44 (0.04 to 4.64)           | 0.37 (0.04 to 3.56)      |
| Seizure                  | 111 / 129316                              | 1644 / 1748402       | 144 / 131258         | 0.88 (0.68 to 1.13)           | 0.82 (0.64 to 1.05)      |
| Arterial aneurysm        | 298 / 128829                              | 3233 / 1743605       | 331 / 130706         | 1.02 (0.86 to 1.20)           | 0.97 (0.83 to 1.13)      |
| Uveitis                  | 31 / 130078                               | 584 / 1758321        | 37 / 132104          | 0.96 (0.60 to 1.54)           | 0.85 (0.53 to 1.37)      |

NE denotes not estimable. Each outcome was studied separately, which is why there may be slight differences in the denominators due to different exclusions.

**Supplementary Table S13: Risk of cerebrovascular infarction, myocarditis and/or pericarditis after vaccination with the individual bivalent omicron adapted vaccine types as a fourth dose by sex and age groups within 28 days in Danish 50+ year-olds during 15 September 2022 to 10 December 2022.**

| Outcome/subgroups                                 | BNT BA.4-5-containing |                    | BNT BA.1-containing |                    | MOD BA.1-containing |                    | Reference period  |                    | Incidence rate ratio (95% CI) |                         |                         |
|---------------------------------------------------|-----------------------|--------------------|---------------------|--------------------|---------------------|--------------------|-------------------|--------------------|-------------------------------|-------------------------|-------------------------|
|                                                   | Events/<br>PYRS       | Rate/<br>1,000,000 | Events<br>/ PYRS    | Rate/<br>1,000,000 | Events<br>/ PYRS    | Rate/<br>1,000,000 | Events/<br>PYRS   | Rate/<br>1,000,000 | BNT BA.4-5-<br>containing     | BNT BA.1-<br>containing | MOD BA.1-<br>containing |
| <b>Cerebrovascular infarction (including TIA)</b> |                       |                    |                     |                    |                     |                    |                   |                    |                               |                         |                         |
| All                                               | 377 /<br>84259        | 343.0              | 246 /<br>38856      | 485.3              | 21 /<br>4189        | 384.3              | 9687 /<br>1853451 | 400.7              | 0.97 (0.86<br>to 1.09)        | 0.98 (0.85<br>to 1.12)  | 0.83 (0.54 to<br>1.29)  |
| Females                                           | 156 /<br>43643        | 274.0              | 118 /<br>21860      | 413.8              | 16 /<br>2292        | 535.2              | 4317 /<br>974392  | 339.6              | 0.92 (0.77<br>to 1.10)        | 0.91 (0.74<br>to 1.11)  | 1.27 (0.76 to<br>2.13)  |
| Males                                             | 221 /<br>40616        | 417.1              | 128 /<br>16997      | 577.3              | 5 /<br>1897         | 202.0              | 5370 /<br>879059  | 468.3              | 1.01 (0.87<br>to 1.19)        | 1.04 (0.86<br>to 1.26)  | 0.41 (0.17 to<br>0.99)  |
| Aged 50 to 64 years                               | 75 /<br>39699         | 144.8              | 21 /<br>8206        | 196.2              | 2 /<br>1315         | 116.6              | 1716 /<br>806017  | 163.2              | 0.89 (0.69<br>to 1.15)        | 1.20 (0.77<br>to 1.87)  | 0.75 (0.19 to<br>3.03)  |
| Aged 65 to 79 years                               | 180 /<br>32245        | 427.9              | 110 /<br>18751      | 449.7              | 6 /<br>1464         | 314.1              | 4036 /<br>690056  | 448.4              | 0.95 (0.81<br>to 1.13)        | 1.02 (0.83<br>to 1.25)  | 0.74 (0.33 to<br>1.65)  |
| Aged 80 years or older                            | 99 /<br>7984          | 950.6              | 105 /<br>9726       | 827.6              | 12 /<br>1192        | 771.5              | 3351 /<br>266105  | 965.4              | 1.07 (0.86<br>to 1.33)        | 0.92 (0.74<br>to 1.13)  | 0.94 (0.53 to<br>1.66)  |
| <b>Myocarditis or pericarditis</b>                |                       |                    |                     |                    |                     |                    |                   |                    |                               |                         |                         |
| All <sup>a</sup>                                  | 18 /<br>85800         | 16.1               | 9 /<br>40116        | 17.2               | 2 /<br>4281         | 35.8               | 322 /<br>1892114  | 13.0               | 1.05 (0.58<br>to 1.92)        | 1.29 (0.61<br>to 2.74)  | 3.17 (0.77 to<br>13.11) |
| Females                                           | 8 /<br>44256          | 13.9               | 5 /<br>22443        | 17.1               | 2 /<br>2331         | 65.8               | 130 /<br>990933   | 10.1               | 0.87 (0.33<br>to 2.33)        | 1.55 (0.58<br>to 4.10)  | 6.45 (1.50 to<br>27.82) |
| Males                                             | 10 /<br>41544         | 18.5               | 4 /<br>17673        | 17.4               | 0 /<br>1950         | NE                 | 192 /<br>901182   | 16.3               | 1.20 (0.56<br>to 2.58)        | 0.99 (0.30<br>to 3.28)  | NE                      |
| Aged 50 to 64 years                               | 8 /<br>40022          | 15.3               | 2 /<br>8313         | 18.4               | 1 /<br>1327         | 57.8               | 144 /<br>812580   | 13.6               | 1.30 (0.57<br>to 2.95)        | 1.46 (0.34<br>to 6.23)  | 5.37 (0.72 to<br>40.12) |
| Aged 65 to 79 years                               | 6 /<br>32993          | 13.9               | 4 /<br>19283        | 15.9               | 1 /<br>1494         | 51.3               | 117 /<br>706700   | 12.7               | 0.95 (0.38<br>to 2.38)        | 1.04 (0.35<br>to 3.04)  | 3.42 (0.46 to<br>25.70) |



**Supplementary Table S13: Risk of cerebrovascular infarction, myocarditis and/or pericarditis after vaccination with the individual bivalent omicron adapted vaccine types as a fourth dose by sex and age groups within 28 days in Danish 50+ year-olds during 15 September 2022 to 10 December 2022.**

| Outcome/subgroups      | BNT BA.4-5-containing |                    | BNT BA.1-containing |                    | MOD BA.1-containing |                    | Reference period |                    | Incidence rate ratio (95% CI) |                         |                         |
|------------------------|-----------------------|--------------------|---------------------|--------------------|---------------------|--------------------|------------------|--------------------|-------------------------------|-------------------------|-------------------------|
|                        | Events/<br>PYRS       | Rate/<br>1,000,000 | Events<br>/ PYRS    | Rate/<br>1,000,000 | Events<br>/ PYRS    | Rate/<br>1,000,000 | Events/<br>PYRS  | Rate/<br>1,000,000 | BNT BA.4-5-<br>containing     | BNT BA.1-<br>containing | MOD BA.1-<br>containing |
| Aged 80 years or older | 0 / 8355              | NE                 | 2 / 10272           | 14.9               | 0 / 1239            | NE                 | 41 / 279247      | 11.3               | NE                            | 1.52 (0.31 to 7.38)     | NE                      |
| <b>Myocarditis</b>     |                       |                    |                     |                    |                     |                    |                  |                    |                               |                         |                         |
| All                    | 6 / 85859             | 5.4                | 2 / 40146           | 3.8                | 1 / 4283            | 17.9               | 64 / 1893405     | 2.6                | 3.74 (1.16 to 12.05)          | 2.59 (0.52 to 12.94)    | 12.39 (1.46 to 105.47)  |
| Females                | 3 / 44278             | 5.2                | 2 / 22455           | 6.8                | 1 / 2332            | 32.9               | 29 / 991433      | 2.2                | 7.10 (1.06 to 47.81)          | 8.50 (1.24 to 58.44)    | 59.58 (4.97 to 714.53)  |
| Males                  | 3 / 41581             | 5.5                | 0 / 17690           | NE                 | 0 / 1951            | NE                 | 35 / 901972      | 3.0                | 2.42 (0.54 to 10.83)          | NE                      | NE                      |
| Aged 50 to 64 years    | 3 / 40050             | 5.7                | 0 / 8320            | NE                 | 1 / 1327            | 57.8               | 25 / 813144      | 2.4                | 4.76 (0.80 to 28.37)          | NE                      | 50.46 (4.55 to 559.52)  |
| Aged 65 to 79 years    | 3 / 33017             | 7.0                | 1 / 19297           | 4.0                | 0 / 1495            | NE                 | 26 / 707193      | 2.8                | 3.04 (0.62 to 15.00)          | 1.55 (0.16 to 14.66)    | NE                      |
| Aged 80 years or older | 0 / 8361              | NE                 | 1 / 10279           | 7.5                | 0 / 1240            | NE                 | 7 / 279421       | 1.9                | NE                            | 16.95 (0.62 to 459.83)  | NE                      |
| <b>Pericarditis</b>    |                       |                    |                     |                    |                     |                    |                  |                    |                               |                         |                         |
| All                    | 14 / 85811            | 12.5               | 7 / 40123           | 13.4               | 1 / 4281            | 17.9               | 265 / 1892351    | 10.7               | 0.85 (0.43 to 1.71)           | 1.12 (0.48 to 2.64)     | 1.82 (0.25 to 13.31)    |
| Females                | 7 / 44260             | 12.1               | 3 / 22445           | 10.2               | 1 / 2331            | 32.9               | 104 / 991018     | 8.0                | 0.75 (0.25 to 2.21)           | 0.99 (0.29 to 3.34)     | 3.14 (0.42 to 23.64)    |
| Males                  | 7 / 41551             | 12.9               | 4 / 17677           | 17.3               | 0 / 1951            | NE                 | 161 / 901332     | 13.7               | 0.96 (0.39 to 2.38)           | 1.23 (0.37 to 4.13)     | NE                      |
| Aged 50 to 64 years    | 6 / 40028             | 11.5               | 2 / 8314            | 18.4               | 0 / 1327            | NE                 | 122 / 812683     | 11.5               | 1.09 (0.43 to 2.73)           | 1.64 (0.38 to 7.07)     | NE                      |

**Supplementary Table S13: Risk of cerebrovascular infarction, myocarditis and/or pericarditis after vaccination with the individual bivalent omicron adapted vaccine types as a fourth dose by sex and age groups within 28 days in Danish 50+ year-olds during 15 September 2022 to 10 December 2022.**

| Outcome/subgroups      | BNT BA.4-5-containing |                    | BNT BA.1-containing |                    | MOD BA.1-containing |                    | Reference period |                    | Incidence rate ratio (95% CI) |                         |                         |
|------------------------|-----------------------|--------------------|---------------------|--------------------|---------------------|--------------------|------------------|--------------------|-------------------------------|-------------------------|-------------------------|
|                        | Events/<br>PYRS       | Rate/<br>1,000,000 | Events<br>/ PYRS    | Rate/<br>1,000,000 | Events<br>/ PYRS    | Rate/<br>1,000,000 | Events/<br>PYRS  | Rate/<br>1,000,000 | BNT BA.4-5-<br>containing     | BNT BA.1-<br>containing | MOD BA.1-<br>containing |
| Aged 65 to 79 years    | 4 /<br>32998          | 9.3                | 3 /<br>19286        | 11.9               | 1 /<br>1494         | 51.3               | 92 /<br>706793   | 10.0               | 0.75 (0.25<br>to 2.25)        | 0.94 (0.27<br>to 3.20)  | 4.09 (0.54 to<br>31.00) |
| Aged 80 years or older | 0 / 8356              | NE                 | 1 /<br>10274        | 7.5                | 0 /<br>1239         | NE                 | 35 /<br>279276   | 9.6                | NE                            | 0.78 (0.09<br>to 6.47)  | NE                      |

BNT denotes BNT162b2, MOD mRNA-1273, NE not estimable, and PYRS total person-years. Each outcome was studied separately, which is why there may be slight differences in the denominators due to different exclusions. Rate/1,000,000 is the incidence rate per 1,000,000 vaccinated within 28 days. The sum of person-years within different strata may not equal the total person-years exactly because of rounding. <sup>a</sup>The IRR estimates are identical to those reported in Figure 5.

**Supplementary Table S14. Risk of cerebrovascular infarction within 28 days after vaccination with a bivalent omicron adapted mRNA-booster vaccine as the fourth dose in Danish 50+ year-olds during 15 September 2022 to 10 December 2022 by influenza vaccination on the same day.**

|                                                                         | <b>Number of events /<br/>person-years</b> | <b>Incidence rate ratio (95% CI)</b> |
|-------------------------------------------------------------------------|--------------------------------------------|--------------------------------------|
| Reference period                                                        | 9687 / 1853528                             | (reference)                          |
| Influenza vaccinated on same day<br>as bivalent booster vaccination     | 412 / 66484                                | 0.93 (0.83 to 1.04)                  |
| Not influenza vaccinated on same<br>day as bivalent booster vaccination | 232 / 60825                                | 1.01 (0.88 to 1.16)                  |

Among the 1740417 individuals who received a fourth dose bivalent booster vaccination, 907731 received an influenza vaccine (predominantly quadrivalent) on the same day (whereof only 783 were high-dose influenza vaccines and no adjuvanted vaccines were identified [consequently, separate analysis not conducted]).

## Supplementary references

1. Schmidt M, Pedersen L, Sørensen HT. The Danish Civil Registration System as a tool in epidemiology. *Eur J Epidemiol* 2014;29(8):541–9.
2. Krause TG, Jakobsen S, Haarh M, Mølbak K. The Danish vaccination register. *Euro Surveill* 2012;17(17):20155.
3. Schmidt M, Schmidt SAJ, Sandegaard JL, Ehrenstein V, Pedersen L, Sørensen HT. The Danish National Patient Registry: a review of content, data quality, and research potential. *Clinical Epidemiology* 2015;449.
